# Supplementary material
Source: PubMed Central journal article supplement (PMC6648627)

**Title: Effects of polyamine binding on stability of DNA i-motif structures**

**Authors:** Michael M. Molnar<sup>†</sup>, Shelby C. Liddell<sup>††</sup>, and Randy M. Wadkins\*

<sup>†,††</sup>, \*Department of Chemistry and Biochemistry, University of Mississippi, University, MS 38677, USA

**Supplementary material:** Figure S1

Mail Address for all authors: 409 Coulter Hall, University, MS 38677

Telephone: +1-662-915-7732

Email: [rwadkins@olemiss.edu](mailto:rwadkins@olemiss.edu)

**Keywords:** DNA Secondary Structure; Putrescine; Spermidine; Spermine; *c-myc gene*; promoter region; proto-oncogene

**Financial Support:** N/A

Figure S1. The change in absorbance for fully folded C6T i-motif DNA at 20 °C and fully unfolded DNA at 80 °C. The observed changes were used to measure  $T_m$  values via UV-Visible spectroscopy. The folded form is indicated by the solid line while the unfolded form is indicated by the dashed line. Spectra were recorded for 4  $\mu$ M C6T DNA in 30 mM cacodylate buffer, pH 5.4. Spectral changes are readily reversible upon heating and cooling. The absorbance at 260 nm was used to determine  $T_m$  values reported here.

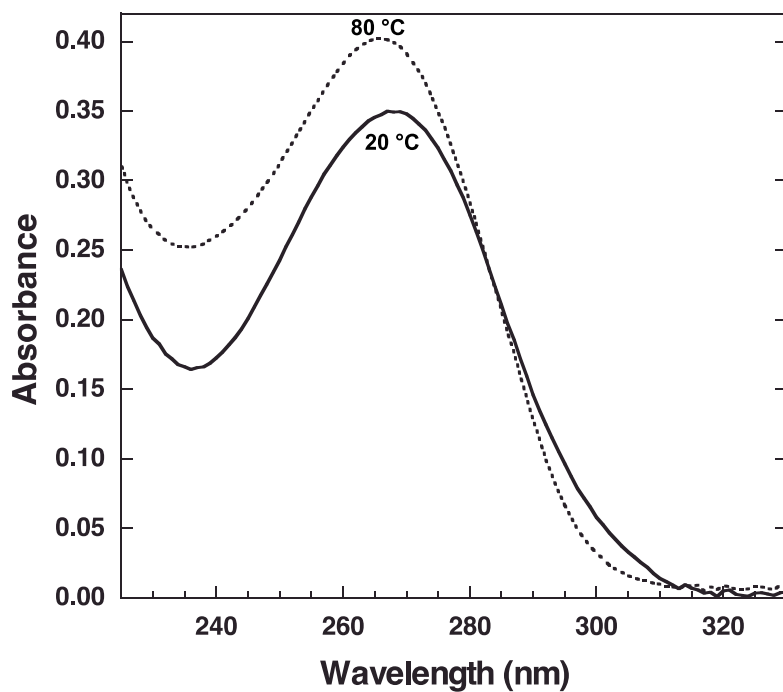

Supplement: ao9b00784_si_001.pdf [file ao9b00784_si_001.pdf]
